# Supplementary material for: Poly(vinylpyrrolidone)–wrapped carbon nanotube-based fuel cell electrocatalyst shows high durability and performance under non-humidified operation
Source: Royal Society of Chemistry journal article supplement (doi:10.1039/c5ta06735a), 2015-01-01
Supplement: c5ta06735a1.pdf [file c5ta06735a1.pdf]

## **Electronic Supplementary Information (ESI)**

for

### **Poly(vinylpyrrolidone)-Wrapped Carbon Nanotube-Based Fuel Cell Electrocatalyst Shows High Durability and Performance Under Non-Humidified Operation**

Zehui Yang<sup>a</sup> and Naotoshi Nakashima<sup>\*a,b,c</sup>

*<sup>a</sup>Department of Applied Chemistry, Graduate School of Engineering, Kyushu University,  
744 Motoooka, Nishi-ku, Fukuoka 819-0395, Japan*

*<sup>b</sup>International Institute for Carbon Neutral Energy Research (WPI-I2CNER), Kyushu  
University, Fukuoka 819-0395, Japan*

*<sup>c</sup>Japan Science and Technology Agency (JST), Core Research for Evolutionary Science  
and Technology (CREST), 5 Sanbancho, Chiyoda-ku, Tokyo, 102-0075, Japan*

\*E-mail: [nakashima-tcm@mail.cstm.kyushu-u.ac.jp](mailto:nakashima-tcm@mail.cstm.kyushu-u.ac.jp)

Table S1. The D/G ratios of the MWNTs and MWNT/PVP/Pt calculated from the Raman spectroscopy.

|           | MWNTs | MWNT/PVP/Pt |
|-----------|-------|-------------|
| D/G ratio | 0.31  | 0.32        |

Table S2. the Pt-NP size calculated from the XRD measurement.

|                 | MWNT/PVP/Pt | CB/Pt |
|-----------------|-------------|-------|
| Pt-NP size (nm) | 2.3         | 2.2   |

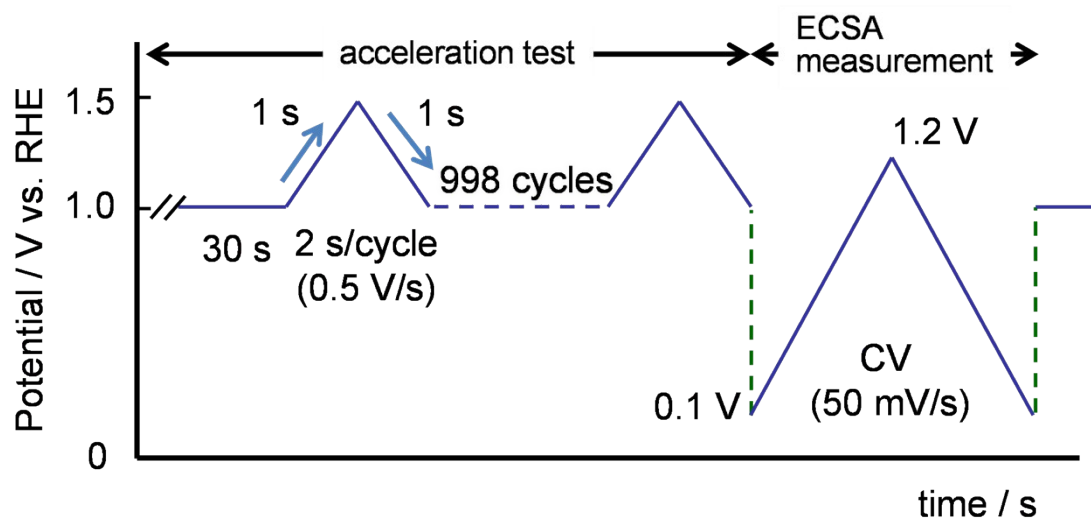

Figure S1. New test protocol of durability for a half-cell taken from FCCJ. (see K. Shinohara, A. Ohma, A. Iiyama, T. Yoshida and T. Daimaru, *ECS Trans.*, 2011, **41**, 775)

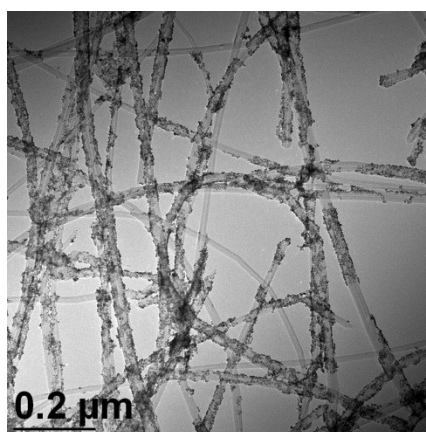

Figure S2. Low magnification TEM image of the as-synthesized MWNT/PVP/Pt.

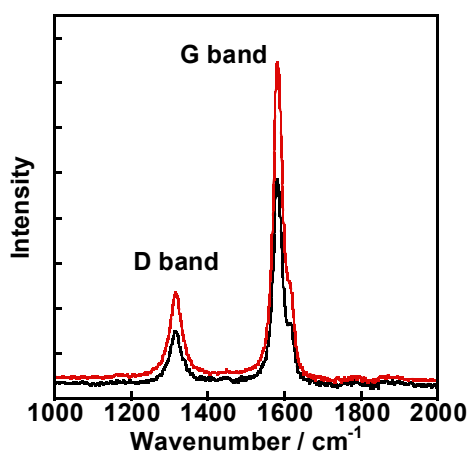

Figure S3. Raman spectra of the MWNTs (black line) and MWNT/PVP/Pt (red line), in which the D and G bands were shown.

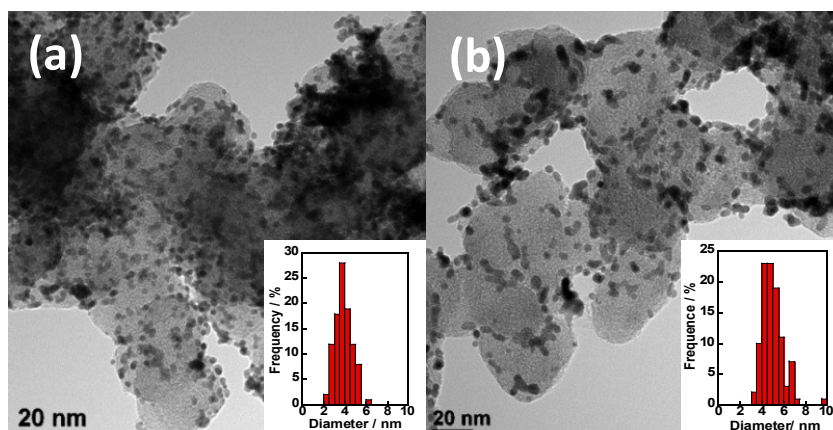

Figure S4. TEM images of the CB/Pt before and after durability testing and the particle size distribution histogram of 100 particles (inset).

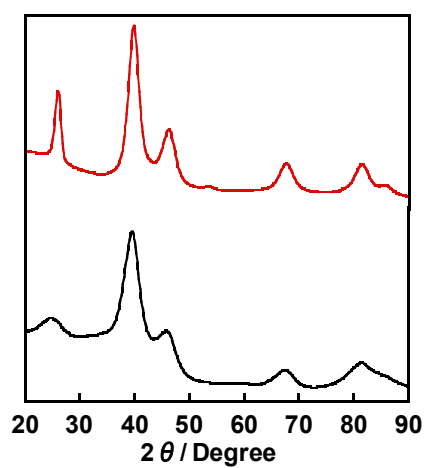

Figure S5. XRD patterns of the MWNT/PVP/Pt (red line) and CB/Pt (black line).

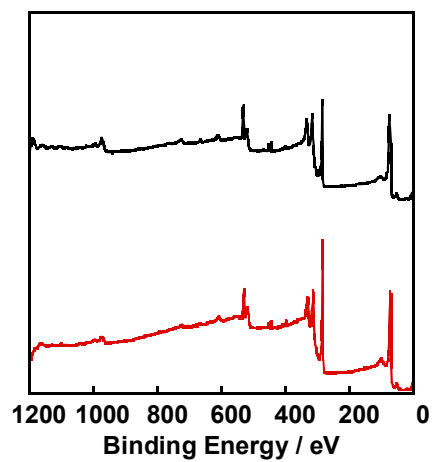

Figure S6. XPS survey scan of the MWNT/PVP/Pt (red line) and CB/Pt (black line).
